# Supplementary material
Source: publisher figshare collection journal article supplement (https://acs.figshare.com/ndownloader/files/4496176)
Supplement: Supplementary file 1 [file 4496176]

 
data_naanapy 
 
_audit_creation_method            SHELXL-97 
_chemical_name_systematic 
; 
 ? 
; 
_chemical_name_common             ? 
_chemical_melting_point           ? 
_chemical_formula_moiety          ? 
_chemical_formula_sum 
 'C24 H16 N2 O4' 
_chemical_formula_weight          396.39 
 
loop_ 
 _atom_type_symbol 
 _atom_type_description 
 _atom_type_scat_dispersion_real 
 _atom_type_scat_dispersion_imag 
 _atom_type_scat_source 
 'C'  'C'   0.0033   0.0016 
 'International Tables Vol C Tables 4.2.6.8 and 6.1.1.4' 
 'H'  'H'   0.0000   0.0000 
 'International Tables Vol C Tables 4.2.6.8 and 6.1.1.4' 
 'N'  'N'   0.0061   0.0033 
 'International Tables Vol C Tables 4.2.6.8 and 6.1.1.4' 
 'O'  'O'   0.0106   0.0060 
 'International Tables Vol C Tables 4.2.6.8 and 6.1.1.4' 
 
_symmetry_cell_setting            Triclinic
_symmetry_space_group_name_H-M    P-1 
 
loop_ 
 _symmetry_equiv_pos_as_xyz 
 'x, y, z' 
 '-x, -y, -z' 
 
_cell_length_a                    8.1612(3) 
_cell_length_b                    9.2908(3) 
_cell_length_c                    13.3668(4) 
_cell_angle_alpha                 100.934(2) 
_cell_angle_beta                  96.943(2) 
_cell_angle_gamma                 95.880(2) 
_cell_volume                      979.62(6) 
_cell_formula_units_Z             2 
_cell_measurement_temperature     296(2) 
_cell_measurement_reflns_used     1318 
_cell_measurement_theta_min       ? 
_cell_measurement_theta_max       ? 
 
_exptl_crystal_description        'Blocks' 
_exptl_crystal_colour             'Colorless' 
_exptl_crystal_size_max           0.40 
_exptl_crystal_size_mid           0.30 
_exptl_crystal_size_min           0.26 
_exptl_crystal_density_meas       ? 
_exptl_crystal_density_diffrn     1.344 
_exptl_crystal_density_method     'not measured' 
_exptl_crystal_F_000              412 
_exptl_absorpt_coefficient_mu     0.093 
_exptl_absorpt_correction_type    none 
_exptl_absorpt_correction_T_min   ? 
_exptl_absorpt_correction_T_max   ? 
_exptl_absorpt_process_details    ? 
 
_exptl_special_details 
; 
 ? 
; 
 
_diffrn_ambient_temperature       296(2) 
_diffrn_radiation_wavelength      0.71073 
_diffrn_radiation_type            MoK\a 
_diffrn_radiation_source          'fine-focus sealed tube' 
_diffrn_radiation_monochromator   graphite 
_diffrn_measurement_device_type   'CCD area detector' 
_diffrn_measurement_method        'phi and omega scans' 
_diffrn_detector_area_resol_mean  ? 
_diffrn_standards_number          ? 
_diffrn_standards_interval_count  ? 
_diffrn_standards_interval_time   ? 
_diffrn_standards_decay_%         ? 
_diffrn_reflns_number             8143 
_diffrn_reflns_av_R_equivalents   0.0247 
_diffrn_reflns_av_sigmaI/netI     0.0575 
_diffrn_reflns_limit_h_min        -10 
_diffrn_reflns_limit_h_max        10 
_diffrn_reflns_limit_k_min        -12 
_diffrn_reflns_limit_k_max        12 
_diffrn_reflns_limit_l_min        -17 
_diffrn_reflns_limit_l_max        17 
_diffrn_reflns_theta_min          1.57 
_diffrn_reflns_theta_max          28.25 
_reflns_number_total              4654 
_reflns_number_gt                 2056 
_reflns_threshold_expression      >2sigma(I) 
 
_computing_data_collection        'Bruker SMART' 
_computing_cell_refinement        'Bruker SMART' 
_computing_data_reduction         'Bruker SAINT' 
_computing_structure_solution     'SHELXS-97 (Sheldrick, 1990)' 
_computing_structure_refinement   'SHELXL-97 (Sheldrick, 1997)' 
_computing_molecular_graphics     'Bruker SHELXTL' 
_computing_publication_material   'Bruker SHELXTL' 
 
_refine_special_details 
; 
 Refinement of F^2^ against ALL reflections.  The weighted R-factor wR and 
 goodness of fit S are based on F^2^, conventional R-factors R are based 
 on F, with F set to zero for negative F^2^. The threshold expression of 
 F^2^ > 2sigma(F^2^) is used only for calculating R-factors(gt) etc. and is 
 not relevant to the choice of reflections for refinement.  R-factors based 
 on F^2^ are statistically about twice as large as those based on F, and R- 
 factors based on ALL data will be even larger. 
; 
 
_refine_ls_structure_factor_coef  Fsqd  
_refine_ls_matrix_type            full 
_refine_ls_weighting_scheme       calc  
_refine_ls_weighting_details 
 'calc w=1/[\s^2^(Fo^2^)+(0.0561P)^2^+0.0000P] where P=(Fo^2^+2Fc^2^)/3' 
_atom_sites_solution_primary      direct 
_atom_sites_solution_secondary    difmap 
_atom_sites_solution_hydrogens    geom 
_refine_ls_hydrogen_treatment     CONSTR 
_refine_ls_extinction_method      none 
_refine_ls_extinction_coef        ? 
_refine_ls_number_reflns          4654 
_refine_ls_number_parameters      272 
_refine_ls_number_restraints      0 
_refine_ls_R_factor_all           0.1328 
_refine_ls_R_factor_gt            0.0516 
_refine_ls_wR_factor_ref          0.1411 
_refine_ls_wR_factor_gt           0.1117 
_refine_ls_goodness_of_fit_ref    1.001 
_refine_ls_restrained_S_all       1.001 
_refine_ls_shift/su_max           0.000 
_refine_ls_shift/su_mean          0.000 
 
loop_ 
 _atom_site_label 
 _atom_site_type_symbol 
 _atom_site_fract_x 
 _atom_site_fract_y 
 _atom_site_fract_z 
 _atom_site_U_iso_or_equiv 
 _atom_site_adp_type 
 _atom_site_occupancy 
 _atom_site_symmetry_multiplicity 
 _atom_site_calc_flag 
 _atom_site_refinement_flags 
 _atom_site_disorder_assembly 
 _atom_site_disorder_group 
C12 C 0.0830(3) 0.1228(2) 0.33623(15) 0.0547(5) Uani 1 1 d . . . 
C11 C 0.2602(2) 0.1009(2) 0.49673(14) 0.0504(5) Uani 1 1 d . . . 
C2 C 0.3104(2) 0.2545(2) 0.51959(14) 0.0507(5) Uani 1 1 d . . . 
C10 C 0.1477(2) 0.0333(2) 0.40811(14) 0.0517(5) Uani 1 1 d . . . 
C1 C 0.2409(2) 0.3480(2) 0.45186(14) 0.0514(5) Uani 1 1 d . . . 
C6 C 0.3258(3) 0.0124(2) 0.56423(16) 0.0590(5) Uani 1 1 d . . . 
C7 C 0.2752(3) -0.1415(3) 0.5388(2) 0.0733(7) Uani 1 1 d . . . 
H7 H 0.3187 -0.2013 0.5811 0.088 Uiso 1 1 calc R . . 
C13 C 0.0690(3) 0.36460(19) 0.29302(13) 0.0522(5) Uani 1 1 d . . . 
C18 C 0.1581(3) 0.3938(2) 0.21471(14) 0.0577(5) Uani 1 1 d . . . 
C8 C 0.1639(3) -0.2041(2) 0.4538(2) 0.0774(7) Uani 1 1 d . . . 
H8 H 0.1304 -0.3055 0.4393 0.093 Uiso 1 1 calc R . . 
C9 C 0.0991(3) -0.1168(2) 0.38758(16) 0.0656(6) Uani 1 1 d . . . 
H9 H 0.0230 -0.1605 0.3295 0.079 Uiso 1 1 calc R . . 
C5 C 0.4404(3) 0.0836(3) 0.65140(18) 0.0749(7) Uani 1 1 d . . . 
H5 H 0.4841 0.0279 0.6967 0.090 Uiso 1 1 calc R . . 
C3 C 0.4230(3) 0.3188(2) 0.60454(15) 0.0636(6) Uani 1 1 d . . . 
H3 H 0.4563 0.4202 0.6185 0.076 Uiso 1 1 calc R . . 
C14 C -0.0787(3) 0.4204(2) 0.30517(15) 0.0651(6) Uani 1 1 d . . . 
H14 H -0.1356 0.4012 0.3584 0.078 Uiso 1 1 calc R . . 
C19 C 0.3199(3) 0.3364(2) 0.19868(17) 0.0691(6) Uani 1 1 d . . . 
C17 C 0.0891(3) 0.4794(2) 0.14903(15) 0.0729(6) Uani 1 1 d . . . 
H17 H 0.1451 0.5000 0.0958 0.087 Uiso 1 1 calc R . . 
C15 C -0.1432(3) 0.5047(3) 0.23902(18) 0.0784(7) Uani 1 1 d . . . 
H15 H -0.2435 0.5417 0.2473 0.094 Uiso 1 1 calc R . . 
C16 C -0.0581(4) 0.5336(3) 0.16095(17) 0.0816(7) Uani 1 1 d . . . 
H16 H -0.1009 0.5902 0.1161 0.098 Uiso 1 1 calc R . . 
C4 C 0.4884(3) 0.2316(3) 0.67065(17) 0.0772(7) Uani 1 1 d . . . 
H4 H 0.5653 0.2757 0.7282 0.093 Uiso 1 1 calc R . . 
O1 O 0.27274(19) 0.48215(14) 0.46862(10) 0.0704(4) Uani 1 1 d . . . 
O2 O -0.0084(2) 0.07066(15) 0.25548(11) 0.0779(5) Uani 1 1 d . . . 
O3 O 0.3859(2) 0.2580(2) 0.24836(12) 0.0927(6) Uani 1 1 d . . . 
O4 O 0.3830(3) 0.3801(2) 0.12204(15) 0.1137(7) Uani 1 1 d . . . 
H4A H 0.4586 0.3321 0.1070 0.171 Uiso 1 1 calc R . . 
N1 N 0.1300(2) 0.27567(16) 0.36437(11) 0.0492(4) Uani 1 1 d . . . 
N2 N 0.6074(3) 0.2285(2) 0.05122(15) 0.0813(6) Uani 1 1 d . . . 
C30 C 0.6453(3) 0.2389(3) -0.04137(19) 0.0940(8) Uani 1 1 d . . . 
H30 H 0.6051 0.3126 -0.0721 0.113 Uiso 1 1 calc R . . 
C28 C 0.6656(3) 0.1239(3) 0.09354(18) 0.0869(8) Uani 1 1 d . . . 
H28 H 0.6422 0.1169 0.1590 0.104 Uiso 1 1 calc R . . 
C29 C 0.7600(4) 0.0238(3) 0.0455(2) 0.0958(8) Uani 1 1 d . . . 
H29 H 0.7970 -0.0504 0.0769 0.115 Uiso 1 1 calc R . . 
C32 C 0.7976(3) 0.0374(3) -0.0505(2) 0.0912(8) Uani 1 1 d . . . 
H32 H 0.8612 -0.0275 -0.0852 0.109 Uiso 1 1 calc R . . 
C31 C 0.7401(3) 0.1468(3) -0.09328(19) 0.0950(8) Uani 1 1 d . . . 
H31 H 0.7652 0.1589 -0.1575 0.114 Uiso 1 1 calc R . . 
 
loop_ 
 _atom_site_aniso_label 
 _atom_site_aniso_U_11 
 _atom_site_aniso_U_22 
 _atom_site_aniso_U_33 
 _atom_site_aniso_U_23 
 _atom_site_aniso_U_13 
 _atom_site_aniso_U_12 
C12 0.0686(14) 0.0464(12) 0.0512(12) 0.0080(10) 0.0188(10) 0.0085(10) 
C11 0.0556(12) 0.0507(12) 0.0554(12) 0.0218(10) 0.0245(10) 0.0157(9) 
C2 0.0565(12) 0.0521(12) 0.0490(11) 0.0171(10) 0.0149(9) 0.0112(9) 
C10 0.0641(13) 0.0409(11) 0.0568(12) 0.0144(9) 0.0226(10) 0.0128(9) 
C1 0.0602(13) 0.0458(12) 0.0512(11) 0.0106(10) 0.0167(9) 0.0088(10) 
C6 0.0601(14) 0.0647(14) 0.0665(13) 0.0316(12) 0.0260(11) 0.0203(11) 
C7 0.0827(18) 0.0648(16) 0.0947(18) 0.0452(14) 0.0371(14) 0.0310(13) 
C13 0.0691(14) 0.0420(11) 0.0473(11) 0.0121(9) 0.0114(9) 0.0069(9) 
C18 0.0753(15) 0.0533(12) 0.0485(11) 0.0156(9) 0.0155(10) 0.0092(10) 
C8 0.0943(19) 0.0465(13) 0.1062(19) 0.0291(14) 0.0413(16) 0.0213(13) 
C9 0.0796(16) 0.0458(12) 0.0765(14) 0.0139(11) 0.0260(11) 0.0124(11) 
C5 0.0705(16) 0.0957(19) 0.0771(16) 0.0500(15) 0.0218(13) 0.0245(14) 
C3 0.0690(15) 0.0673(14) 0.0571(12) 0.0198(11) 0.0105(11) 0.0060(11) 
C14 0.0787(16) 0.0634(13) 0.0622(13) 0.0219(11) 0.0210(11) 0.0214(11) 
C19 0.0898(18) 0.0643(15) 0.0591(13) 0.0147(11) 0.0300(12) 0.0109(12) 
C17 0.1019(19) 0.0691(15) 0.0560(13) 0.0259(11) 0.0212(12) 0.0140(13) 
C15 0.0855(18) 0.0792(16) 0.0798(15) 0.0271(13) 0.0125(13) 0.0328(13) 
C16 0.105(2) 0.0777(16) 0.0709(15) 0.0317(13) 0.0068(14) 0.0266(14) 
C4 0.0744(16) 0.0945(19) 0.0660(14) 0.0305(14) 0.0039(11) 0.0071(14) 
O1 0.0909(11) 0.0432(8) 0.0742(9) 0.0133(7) 0.0022(7) 0.0045(7) 
O2 0.1068(13) 0.0575(9) 0.0621(9) 0.0081(8) -0.0024(9) 0.0014(8) 
O3 0.0927(13) 0.1241(15) 0.0839(11) 0.0456(11) 0.0358(9) 0.0465(11) 
O4 0.1353(17) 0.1261(16) 0.1192(13) 0.0654(13) 0.0815(13) 0.0512(12) 
N1 0.0655(11) 0.0404(9) 0.0451(9) 0.0132(7) 0.0126(7) 0.0086(7) 
N2 0.0823(14) 0.0934(15) 0.0742(13) 0.0226(11) 0.0275(11) 0.0105(11) 
C30 0.092(2) 0.122(2) 0.0824(17) 0.0410(16) 0.0337(15) 0.0227(17) 
C28 0.0828(19) 0.116(2) 0.0636(15) 0.0230(15) 0.0150(13) 0.0062(16) 
C29 0.083(2) 0.117(2) 0.0877(19) 0.0268(17) -0.0029(15) 0.0215(16) 
C32 0.0676(17) 0.126(2) 0.0701(17) -0.0037(16) 0.0039(13) 0.0191(15) 
C31 0.0839(19) 0.138(3) 0.0689(16) 0.0246(17) 0.0238(14) 0.0200(18) 
 
_geom_special_details 
; 
 All esds (except the esd in the dihedral angle between two l.s. planes) 
 are estimated using the full covariance matrix.  The cell esds are taken 
 into account individually in the estimation of esds in distances, angles 
 and torsion angles; correlations between esds in cell parameters are only 
 used when they are defined by crystal symmetry.  An approximate (isotropic) 
 treatment of cell esds is used for estimating esds involving l.s. planes. 
; 
 
loop_ 
 _geom_bond_atom_site_label_1 
 _geom_bond_atom_site_label_2 
 _geom_bond_distance 
 _geom_bond_site_symmetry_2 
 _geom_bond_publ_flag 
C12 O2 1.220(2) . ? 
C12 N1 1.399(2) . ? 
C12 C10 1.471(3) . ? 
C11 C10 1.406(3) . ? 
C11 C2 1.408(2) . ? 
C11 C6 1.426(2) . ? 
C2 C3 1.367(3) . ? 
C2 C1 1.473(2) . ? 
C10 C9 1.375(3) . ? 
C1 O1 1.219(2) . ? 
C1 N1 1.400(2) . ? 
C6 C5 1.410(3) . ? 
C6 C7 1.412(3) . ? 
C7 C8 1.359(3) . ? 
C7 H7 0.9300 . ? 
C13 C14 1.375(3) . ? 
C13 C18 1.396(2) . ? 
C13 N1 1.452(2) . ? 
C18 C17 1.399(3) . ? 
C18 C19 1.498(3) . ? 
C8 C9 1.403(3) . ? 
C8 H8 0.9300 . ? 
C9 H9 0.9300 . ? 
C5 C4 1.357(3) . ? 
C5 H5 0.9300 . ? 
C3 C4 1.403(3) . ? 
C3 H3 0.9300 . ? 
C14 C15 1.381(3) . ? 
C14 H14 0.9300 . ? 
C19 O3 1.200(2) . ? 
C19 O4 1.312(2) . ? 
C17 C16 1.364(3) . ? 
C17 H17 0.9300 . ? 
C15 C16 1.373(3) . ? 
C15 H15 0.9300 . ? 
C16 H16 0.9300 . ? 
C4 H4 0.9300 . ? 
O4 H4A 0.8200 . ? 
N2 C28 1.315(3) . ? 
N2 C30 1.330(3) . ? 
C30 C31 1.362(3) . ? 
C30 H30 0.9300 . ? 
C28 C29 1.382(3) . ? 
C28 H28 0.9300 . ? 
C29 C32 1.380(3) . ? 
C29 H29 0.9300 . ? 
C32 C31 1.354(3) . ? 
C32 H32 0.9300 . ? 
C31 H31 0.9300 . ? 
 
loop_ 
 _geom_angle_atom_site_label_1 
 _geom_angle_atom_site_label_2 
 _geom_angle_atom_site_label_3 
 _geom_angle 
 _geom_angle_site_symmetry_1 
 _geom_angle_site_symmetry_3 
 _geom_angle_publ_flag 
O2 C12 N1 119.63(18) . . ? 
O2 C12 C10 123.52(18) . . ? 
N1 C12 C10 116.85(18) . . ? 
C10 C11 C2 121.17(17) . . ? 
C10 C11 C6 119.49(18) . . ? 
C2 C11 C6 119.33(19) . . ? 
C3 C2 C11 120.74(18) . . ? 
C3 C2 C1 119.25(18) . . ? 
C11 C2 C1 120.00(18) . . ? 
C9 C10 C11 120.29(18) . . ? 
C9 C10 C12 119.71(19) . . ? 
C11 C10 C12 119.99(17) . . ? 
O1 C1 N1 119.30(17) . . ? 
O1 C1 C2 123.95(18) . . ? 
N1 C1 C2 116.75(16) . . ? 
C5 C6 C7 123.8(2) . . ? 
C5 C6 C11 118.0(2) . . ? 
C7 C6 C11 118.2(2) . . ? 
C8 C7 C6 121.3(2) . . ? 
C8 C7 H7 119.4 . . ? 
C6 C7 H7 119.4 . . ? 
C14 C13 C18 120.78(18) . . ? 
C14 C13 N1 118.13(16) . . ? 
C18 C13 N1 121.08(18) . . ? 
C13 C18 C17 117.1(2) . . ? 
C13 C18 C19 122.81(18) . . ? 
C17 C18 C19 120.06(19) . . ? 
C7 C8 C9 120.4(2) . . ? 
C7 C8 H8 119.8 . . ? 
C9 C8 H8 119.8 . . ? 
C10 C9 C8 120.3(2) . . ? 
C10 C9 H9 119.8 . . ? 
C8 C9 H9 119.8 . . ? 
C4 C5 C6 121.4(2) . . ? 
C4 C5 H5 119.3 . . ? 
C6 C5 H5 119.3 . . ? 
C2 C3 C4 119.9(2) . . ? 
C2 C3 H3 120.0 . . ? 
C4 C3 H3 120.0 . . ? 
C13 C14 C15 120.57(19) . . ? 
C13 C14 H14 119.7 . . ? 
C15 C14 H14 119.7 . . ? 
O3 C19 O4 122.7(2) . . ? 
O3 C19 C18 125.03(19) . . ? 
O4 C19 C18 112.3(2) . . ? 
C16 C17 C18 121.8(2) . . ? 
C16 C17 H17 119.1 . . ? 
C18 C17 H17 119.1 . . ? 
C16 C15 C14 119.5(2) . . ? 
C16 C15 H15 120.3 . . ? 
C14 C15 H15 120.3 . . ? 
C17 C16 C15 120.2(2) . . ? 
C17 C16 H16 119.9 . . ? 
C15 C16 H16 119.9 . . ? 
C5 C4 C3 120.6(2) . . ? 
C5 C4 H4 119.7 . . ? 
C3 C4 H4 119.7 . . ? 
C19 O4 H4A 109.5 . . ? 
C12 N1 C1 125.08(16) . . ? 
C12 N1 C13 117.19(16) . . ? 
C1 N1 C13 117.55(15) . . ? 
C28 N2 C30 117.6(2) . . ? 
N2 C30 C31 123.1(2) . . ? 
N2 C30 H30 118.5 . . ? 
C31 C30 H30 118.5 . . ? 
N2 C28 C29 123.2(2) . . ? 
N2 C28 H28 118.4 . . ? 
C29 C28 H28 118.4 . . ? 
C32 C29 C28 118.0(3) . . ? 
C32 C29 H29 121.0 . . ? 
C28 C29 H29 121.0 . . ? 
C31 C32 C29 118.9(3) . . ? 
C31 C32 H32 120.6 . . ? 
C29 C32 H32 120.6 . . ? 
C32 C31 C30 119.3(2) . . ? 
C32 C31 H31 120.3 . . ? 
C30 C31 H31 120.3 . . ? 
 
loop_ 
 _geom_torsion_atom_site_label_1 
 _geom_torsion_atom_site_label_2 
 _geom_torsion_atom_site_label_3 
 _geom_torsion_atom_site_label_4 
 _geom_torsion 
 _geom_torsion_site_symmetry_1 
 _geom_torsion_site_symmetry_2 
 _geom_torsion_site_symmetry_3 
 _geom_torsion_site_symmetry_4 
 _geom_torsion_publ_flag 
C10 C11 C2 C3 -178.35(17) . . . . ? 
C6 C11 C2 C3 1.1(3) . . . . ? 
C10 C11 C2 C1 1.9(3) . . . . ? 
C6 C11 C2 C1 -178.66(16) . . . . ? 
C2 C11 C10 C9 -179.47(17) . . . . ? 
C6 C11 C10 C9 1.1(3) . . . . ? 
C2 C11 C10 C12 1.3(3) . . . . ? 
C6 C11 C10 C12 -178.16(16) . . . . ? 
O2 C12 C10 C9 -3.0(3) . . . . ? 
N1 C12 C10 C9 176.63(16) . . . . ? 
O2 C12 C10 C11 176.30(18) . . . . ? 
N1 C12 C10 C11 -4.1(3) . . . . ? 
C3 C2 C1 O1 -2.9(3) . . . . ? 
C11 C2 C1 O1 176.85(17) . . . . ? 
C3 C2 C1 N1 178.13(16) . . . . ? 
C11 C2 C1 N1 -2.1(2) . . . . ? 
C10 C11 C6 C5 178.96(17) . . . . ? 
C2 C11 C6 C5 -0.5(3) . . . . ? 
C10 C11 C6 C7 0.3(3) . . . . ? 
C2 C11 C6 C7 -179.18(16) . . . . ? 
C5 C6 C7 C8 179.9(2) . . . . ? 
C11 C6 C7 C8 -1.5(3) . . . . ? 
C14 C13 C18 C17 -1.1(3) . . . . ? 
N1 C13 C18 C17 179.45(17) . . . . ? 
C14 C13 C18 C19 179.64(19) . . . . ? 
N1 C13 C18 C19 0.2(3) . . . . ? 
C6 C7 C8 C9 1.4(3) . . . . ? 
C11 C10 C9 C8 -1.3(3) . . . . ? 
C12 C10 C9 C8 178.01(18) . . . . ? 
C7 C8 C9 C10 0.0(3) . . . . ? 
C7 C6 C5 C4 178.1(2) . . . . ? 
C11 C6 C5 C4 -0.5(3) . . . . ? 
C11 C2 C3 C4 -0.7(3) . . . . ? 
C1 C2 C3 C4 179.03(18) . . . . ? 
C18 C13 C14 C15 1.0(3) . . . . ? 
N1 C13 C14 C15 -179.49(18) . . . . ? 
C13 C18 C19 O3 2.1(3) . . . . ? 
C17 C18 C19 O3 -177.2(2) . . . . ? 
C13 C18 C19 O4 -178.67(19) . . . . ? 
C17 C18 C19 O4 2.0(3) . . . . ? 
C13 C18 C17 C16 0.6(3) . . . . ? 
C19 C18 C17 C16 179.9(2) . . . . ? 
C13 C14 C15 C16 -0.4(3) . . . . ? 
C18 C17 C16 C15 0.0(4) . . . . ? 
C14 C15 C16 C17 -0.1(4) . . . . ? 
C6 C5 C4 C3 0.9(3) . . . . ? 
C2 C3 C4 C5 -0.3(3) . . . . ? 
O2 C12 N1 C1 -176.38(17) . . . . ? 
C10 C12 N1 C1 4.0(3) . . . . ? 
O2 C12 N1 C13 -1.4(3) . . . . ? 
C10 C12 N1 C13 178.98(16) . . . . ? 
O1 C1 N1 C12 -179.99(17) . . . . ? 
C2 C1 N1 C12 -1.0(2) . . . . ? 
O1 C1 N1 C13 5.1(2) . . . . ? 
C2 C1 N1 C13 -175.91(15) . . . . ? 
C14 C13 N1 C12 91.6(2) . . . . ? 
C18 C13 N1 C12 -88.9(2) . . . . ? 
C14 C13 N1 C1 -93.1(2) . . . . ? 
C18 C13 N1 C1 86.4(2) . . . . ? 
C28 N2 C30 C31 0.2(4) . . . . ? 
C30 N2 C28 C29 -1.5(4) . . . . ? 
N2 C28 C29 C32 1.6(4) . . . . ? 
C28 C29 C32 C31 -0.3(4) . . . . ? 
C29 C32 C31 C30 -0.9(4) . . . . ? 
N2 C30 C31 C32 1.0(4) . . . . ? 
 
_diffrn_measured_fraction_theta_max    0.961 
_diffrn_reflns_theta_full              28.25 
_diffrn_measured_fraction_theta_full   0.961 
_refine_diff_density_max    0.115 
_refine_diff_density_min   -0.149 
_refine_diff_density_rms    0.031 
